# Supplementary material
Source: HighWire-hosted journal article supplement (http://jpet.aspetjournals.org/highwire/filestream/139307/field_highwire_adjunct_files/4/238790Supplemental_File_5.xlsx)
Supplement: 238790Supplemental_File_5.xlsx [file 238790Supplemental_File_5.xlsx]

## Sheet: Supplementary_File-5-MCD-Reacto
Name	Genes (tot)	Stat (dist.dir.up)	p (dist.dir.up)	p adj (dist.dir.up)	Stat (dist.dir.dn)	p (dist.dir.dn)	p adj (dist.dir.dn)
Downstream_signaling_of_activated_FGFR4	31	0.10155	0.0604	0.076228	0.89845	0.9396	1
Signaling_by_EGFR	32	0.098434	0.0543	0.076228	0.90157	0.9457	1
RHO_GTPase_Effectors	54	0.043491	0.0004	0.0024	0.95651	0.9996	1
SLC-mediated_transmembrane_transport	31	0.23291	0.7543	0.78331	0.76709	0.2457	1
Signaling_by_FGFR3	31	0.10155	0.0604	0.076228	0.89845	0.9396	1
Signaling_by_FGFR2	31	0.10155	0.0604	0.076228	0.89845	0.9396	1
Signaling_by_GPCR	104	0.10999	0.0051	0.0153	0.89001	0.9949	1
Developmental_Biology	55	0.080352	0.0099	0.025457	0.91965	0.9901	1
Signaling_by_FGFR4	31	0.10155	0.0604	0.076228	0.89845	0.9396	1
Downstream_signal_transduction	33	0.12584	0.1268	0.14885	0.87416	0.8732	1
M_Phase	44	0.0084074	0	0	0.99159	1	1
Signaling_by_Rho_GTPases	79	0.069886	0.0004	0.0024	0.93011	0.9996	1
Innate_Immune_System	109	0.087326	0.0002	0.0018	0.91267	0.9998	1
DAP12_interactions	44	0.073546	0.0089	0.02403	0.92645	0.9911	1
Immune_System	187	0.074057	0	0	0.92594	1	1
Gastrin-CREB_signalling_pathway_via_PKC_and_MAPK	39	0.08274	0.0228	0.049248	0.91726	0.9772	1
Hemostasis	98	0.11674	0.0119	0.029209	0.88326	0.9881	1
DAP12_signaling	38	0.084368	0.0202	0.04545	0.91563	0.9798	1
Signaling_by_PDGF	42	0.098921	0.0296	0.0604	0.90108	0.9704	1
Cell_Cycle	72	0.025313	0	0	0.97469	1	1
Metabolism_of_proteins	33	0.18757	0.4815	0.50982	0.81243	0.5185	1
Downstream_signaling_of_activated_FGFR2	31	0.10155	0.0604	0.076228	0.89845	0.9396	1
Class_A_1_(Rhodopsin-like_receptors)	42	0.099103	0.0302	0.0604	0.9009	0.9698	1
Downstream_signaling_of_activated_FGFR3	31	0.10155	0.0604	0.076228	0.89845	0.9396	1
RHO_GTPases_Activate_Formins	32	0.0095145	0.0007	0.00378	0.99049	0.9993	1
Signaling_by_FGFR1	31	0.10155	0.0604	0.076228	0.89845	0.9396	1
Extracellular_matrix_organization	76	0.095146	0.0061	0.017337	0.90485	0.9939	1
Signaling_Pathways	239	0.13501	0.0024	0.0081	0.86499	0.9976	1
Fc_epsilon_receptor_(FCERI)_signaling	36	0.089229	0.0372	0.069269	0.91077	0.9628	1
Signaling_by_VEGF	32	0.09739	0.0465	0.076228	0.90261	0.9535	1
Platelet_activation,_signaling_and_aggregation	44	0.14029	0.1451	0.16671	0.85971	0.8549	1
Signaling_by_Interleukins	31	0.10262	0.0756	0.09072	0.89738	0.9244	1
VEGFA-VEGFR2_Pathway	32	0.09739	0.0465	0.076228	0.90261	0.9535	1
GPCR_downstream_signaling	75	0.11125	0.0174	0.040852	0.88875	0.9826	1
GPCR_ligand_binding	50	0.12427	0.0747	0.09072	0.87573	0.9253	1
Mitotic_Metaphase_and_Anaphase	31	0.0087875	0.001	0.0038571	0.99121	0.999	1
Separation_of_Sister_Chromatids	31	0.0087875	0.001	0.0038571	0.99121	0.999	1
Resolution_of_Sister_Chromatid_Cohesion	31	0.0086584	0.001	0.0038571	0.99134	0.999	1
Mitotic_Prometaphase	35	0.0099813	0.0004	0.0024	0.99002	0.9996	1
Metabolism	156	0.35497	1	1	0.64503	0	0
Carbohydrate_metabolism	37	0.1917	0.4399	0.47509	0.8083	0.5601	1
Axon_guidance	49	0.067961	0.0043	0.013659	0.93204	0.9957	1
G_alpha_(i)_signalling_events	36	0.14111	0.1661	0.18686	0.85889	0.8339	1
Cell_Cycle,_Mitotic	66	0.024313	0.0001	0.00135	0.97569	0.9999	1
Transmembrane_transport_of_small_molecules	64	0.16424	0.2933	0.32323	0.83576	0.7067	1
Cytokine_Signaling_in_Immune_system	61	0.053691	0.0002	0.0018	0.94631	0.9998	1
Signaling_by_ERBB2	33	0.095936	0.0489	0.076228	0.90406	0.9511	1
NGF_signalling_via_TRKA_from_the_plasma_membrane	35	0.090738	0.0321	0.061907	0.90926	0.9679	1
Metabolism_of_lipids_and_lipoproteins	55	0.29343	0.9631	0.98127	0.70657	0.0369	0.9963
Downstream_signaling_of_activated_FGFR1	31	0.10155	0.0604	0.076228	0.89845	0.9396	1
Signaling_by_NGF	46	0.11377	0.0607	0.076228	0.88623	0.9393	1
Mitotic_Anaphase	31	0.0087875	0.001	0.0038571	0.99121	0.999	1
Signaling_by_FGFR	31	0.10155	0.0604	0.076228	0.89845	0.9396	1
Adaptive_Immune_System	85	0.086757	0.0014	0.00504	0.91324	0.9986	1
